# Supplementary material
Source: Research Square preprint supplement (doi:10.21203/rs.3.rs-8870411/v1)
Supplement: Supplementary file 1 [file f143cbd413714034644d71ab.pdf]

## Development and Evaluation of a Clinical Model to Predict High-Frequency Hearing

### Prognosis in Menière's Disease

#### Model development and internal validation

For the model development for high-frequency hearing levels on the affected side during the 1–2-year period after the initial visit (HFH-Prognosis), we used the same procedure as that of the low-frequency hearing model ( $n = 92$ ). The model incorporating age and high-frequency hearing level at the initial visit (HFH-Initial) yielded the smallest average root mean square error (RMSE). On the affected side, high correlation was observed between HFH-Initial and age; however, no multicollinearity was detected (variance inflation factor  $< 3$ ). The predictive model is expressed as follows:

“Predicted value for HFH-Prognosis =  $a + b1 \times \text{age} + b2 \times \text{HFH-Initial}$ ”

**TABLE 1** presents the intercept ( $a$ ) and regression coefficients ( $b1$ ,  $b2$ ) for each of the four predictive models (Models 1–4). By substituting age and high-frequency hearing level at the initial visit into the predictive model, predicted high-frequency hearing levels 1 year later were calculated.

**FIGURE 1A** shows plots of the predicted versus measured values for internal validation of the predictive models, along with the accuracy metrics for each model. RMSE ranged from 7.6

to 11.6, and  $R^2$  ranged from 0.74 to 0.90, suggesting reliable predictive performance with no evidence of overfitting.

### External validation

External validation was conducted to assess the generalisability of the predictive model to new cases. Patient data from the external validation cohort ( $n = 32$ ) were applied to Models 1–4, and the average of the four predicted values was used as the final HFH-Prognosis estimate.

**FIGURE 1B** shows plot of predicted versus the measured values for external validation. RMSE was 12.6, and  $R^2$  was 0.71, demonstrating that the proposed model can be applied to unseen datasets.

### Prediction of HFH-Prognosis on the healthy side

When the predictive model was validated using hearing test results from the healthy side, the model also produced accurate predictions (**FIGURE 2**). This suggests that the model cannot specifically predict high-frequency hearing prognosis on the affected side in patients with Menière’s Disease.

**TABLE 1: Regression coefficients of the predictive models for HFH-Prognosis**

| Model   | $a$    | $b1$ (95% CI)    | $b2$ (95% CI)    |
|---------|--------|------------------|------------------|
| Model 1 | -8.84  | 0.30 (0.12–0.48) | 0.82 (0.71–0.93) |
| Model 2 | -12.43 | 0.35 (0.18–0.53) | 0.83 (0.70–0.96) |
| Model 3 | -9.94  | 0.32 (0.12–0.52) | 0.83 (0.70–0.96) |
| Model 4 | -10.12 | 0.34 (0.16–0.52) | 0.82 (0.70–0.95) |

$a$  indicates the intercept.  $b1$  represents the regression coefficient for age.  $b2$  represents the regression coefficient for HFH-initial. A 95% CI was also provided for the regression coefficients. HFH-Prognosis, high-frequency hearing level measured during the 1–2-year period after the initial visit; HFH-initial, high-frequency hearing level at the initial visit; CI, confidence interval.

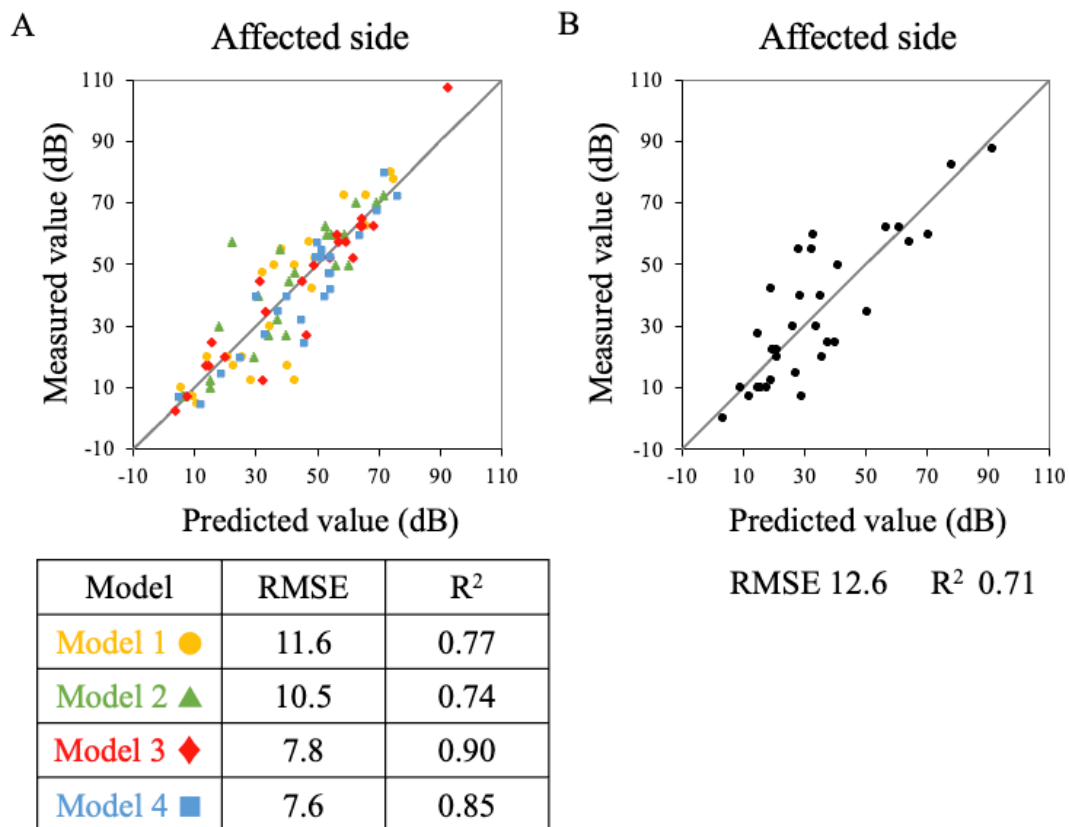

**FIGURE 1: Performance of the predictive model for HFH-Prognosis.**

Plots of predicted versus measured HFH-Prognosis values and the linear fit when predicted and measured values match (grey), along with RMSE and correlation coefficient ( $R^2$ ). **(A)** Internal validation. Verification results for each model ( $n = 23$ ; Model 1–4) are shown. **(B)** External

validation. Results of the external validation cohort ( $n = 32$ ) are shown. RMSE, root mean square error; HFH-Prognosis, high-frequency hearing level measured during the 1–2-year period after the initial visit.

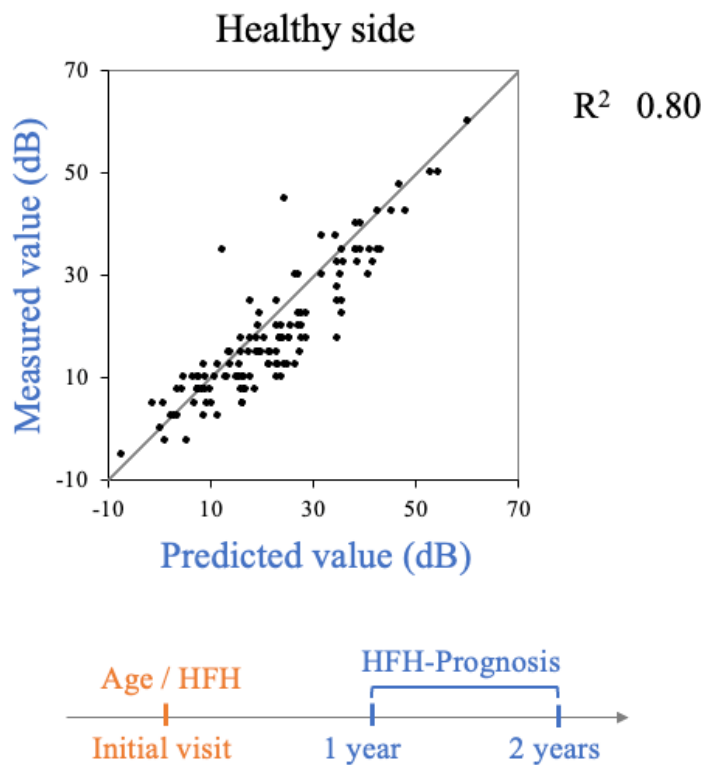

**FIGURE 2: Predictive performance of HFH-Prognosis on the healthy side using the affected-side predictive model.**

Plot of predicted versus measured HFH-Prognosis values on the healthy side ( $n = 124$ ) and regression line (grey), along with correlation coefficient ( $R^2$ ). HFH-Prognosis, high-frequency hearing level measured during the 1–2-year period after the initial visit.
